# Supplementary material for: A Notch-dependent molecular circuitry initiates pancreatic endocrine and ductal cell differentiation
Source: Oxford University Press journal article supplement (doi:10.1242/dev.078634), 2012-06-07
Supplement: dev078634tabless1-s4.pdf [file dev078634tabless1-s4.pdf]

**Table S1. Summary of antibodies utilized for immunofluorescence staining**

| <b>Primary antibodies</b>        |                  |                                                                  |                 |
|----------------------------------|------------------|------------------------------------------------------------------|-----------------|
| <b>Antigen</b>                   | <b>Species</b>   | <b>Source</b>                                                    | <b>Dilution</b> |
| Sox9                             | Rabbit           | Chemicon                                                         | 1:1000          |
| Glucagon (Gcg)                   | Goat             | Santa Cruz                                                       | 1:1000          |
| Glucagon (Gcg)                   | Mouse            | Sigma                                                            | 1:5000          |
| Insulin (Ins)                    | Guinea Pig       | Dakocytomation                                                   | 1:1000          |
| Pancreatic Polypeptide           | Rabbit           | Dakocytomation                                                   | 1:2000          |
| Somatostatin                     | Rabbit           | Dakocytomation                                                   | 1:3000          |
| Ptf1a                            | Rabbit           | B. Breant, INSERM-Paris                                          | 1:3000          |
| Tcf2                             | Goat             | Santa Cruz                                                       | 1:200*          |
| Prox1                            | Rabbit           | Covance Research Products                                        | 1:3000          |
| Amylase                          | Rabbit           | Sigma                                                            | 1:500           |
| Ngn3                             | Guinea Pig       | (Henseleit et al., 2005)                                         | 1:1000          |
| GFP                              | Rat              | C. Kioussi, Oregon State University, OR, USA                     | 1:1000          |
| GFP                              | Rabbit           | Invitrogen                                                       | 1:1000          |
| Pdx1                             | Guinea Pig       | C. Wright, Vanderbilt University, TN, USA                        | 1:10,000        |
| Nkx6.1                           | Mouse            | BCBC clone 2023                                                  | 1:500           |
| Mucin-1 (Muc1)                   | Armenian hamster | Lab Vision                                                       | 1:200           |
| Osteopontin (Spp1)               | Goat             | R&D Systems                                                      | 1:1000          |
| DBA                              | (Biotinylated)   | Vector Laboratories                                              | 1:500*          |
| E-cadherin (Ecad)                | Rat              | Sigma                                                            | 1:1000          |
| E-cadherin (Ecad)                | Rabbit           | Cell Signaling                                                   | 1:500           |
| $\beta$ -catenin ( $\beta$ -Cat) | Rabbit           | Cell Signaling                                                   | 1:500           |
| CD133                            | Rat              | eBiosciences                                                     | 1:1000          |
| Acetylated- $\alpha$ -tubulin    | Mouse            | Sigma                                                            | 1:3000          |
| Pkd2                             | Rabbit           | Santa Cruz                                                       | 1:500           |
| ZO-1                             | Rabbit           | Invitrogen                                                       | 1:100           |
| Rbp-jk                           | Rabbit           | Proteintech Group                                                | 1:500           |
| Notch1                           | Sheep            | R&D Systems                                                      | 1:200           |
| Notch2                           | Goat             | R&D Systems                                                      | 1:200           |
| Dll1                             | Sheep            | R&D Systems                                                      | 1:200           |
| Jagged1                          | Goat             | Santa Cruz                                                       | 1:500           |
| NICD1                            | Rabbit           | Abcam                                                            | 1:500*          |
| NICD2                            | Rat              | Developmental Studies Hybridoma Bank                             | 1:50**          |
| NICD2                            | Rabbit           | Chemicon                                                         | 1:1000**        |
| Hes1                             | Rabbit           | T. Sudo, Toray Industries, Tokyo                                 | 1:5000**        |
| Hes1                             | Rabbit           | N. Brown, Cincinnati Children's Hospital Medical Center, OH, USA | 1:1000*         |
| Hes1                             | Rat              | MBL international                                                | 1:500           |

| <b>Secondary antibodies</b>                   |                    |                        |                 |
|-----------------------------------------------|--------------------|------------------------|-----------------|
| <b>Antigen</b>                                | <b>Conjugation</b> | <b>Source</b>          | <b>Dilution</b> |
| Rabbit/Goat/Mouse/Guinea Pig/Rat              | Alexa-488          | Invitrogen             | 1:2000          |
| Rabbit/Goat/Mouse/Guinea/Armenian Hamster Pig | Cy3                | Jackson ImmunoResearch | 1:2000          |
| Rabbit/Goat/Mouse/Guinea Pig/Armenian Hamster | Cy5                | Jackson ImmunoResearch | 1:500           |
| Rabbit/Goat/Rat/mouse                         | Biotinylated       | Vector Laboratories    | 1:250           |

\*A biotin-conjugated secondary antibody followed by streptavidin amplification was used.

\*\*Tyramide signal amplification (TSA) was used as per manufacturer's instructions (Invitrogen).

**Table S2. Primers used in plasmid construction and qRT-PCR**

| <b>Primer</b> | <b>Sequence (5'-3')</b>         |
|---------------|---------------------------------|
| BamHI-mNgn3-F | CGTAGGATCCATGGCGCCTCATCCCTTGGAT |
| BglII-mNgn3-R | AGATCTTCACAAGAAGTCTGAACACC      |
| mSox9-F       | AGACTCACATCTCTCCTAATGCT         |
| mSox9-R       | ACGTCGGTTTTGGGAGTGG             |
| mNgn3-F       | AATGATCGGGAGCGCAATCG            |
| mNgn3-R       | CGCAGGGTCTCGACCTTTG             |
| mHes1-F       | GACGGCCAATTTGCCTTC              |
| mHes1-R       | GAGTCCGAAGTGAGCGAGGA            |

**Table S3. Quantification of Sox9- and Hes1-expressing cells in pancreatic explants from *Sox9-eGFP* embryos at E12.5 cultured for three days in the presence of  $\gamma$ -secretase inhibitor-IX (GSI-IX)**

| <b>Experimental groups</b>  | <b>Sox9<sup>+</sup> cells (% of Ecad<sup>+</sup> cells*)</b> | <b>Hes1<sup>+</sup> cells (% of <math>\beta</math>-catenin<sup>+</sup> cells*)</b> |
|-----------------------------|--------------------------------------------------------------|------------------------------------------------------------------------------------|
| Control explants            | 52.7 $\pm$ 5.2 (461 cells counted)                           | 34.4 $\pm$ 8.1 (612 cells counted)                                                 |
| Explants +1 $\mu$ M GSI-IX  | 43.1 $\pm$ 5.6 (796 cells counted)                           | 15.6 $\pm$ 2.8 (778 cells counted)                                                 |
| Explants +5 $\mu$ M GSI-IX  | 18.5 $\pm$ 4.3 (677 cells counted)                           | 6.8 $\pm$ 2.5 (739 cells counted)                                                  |
| Explants +10 $\mu$ M GSI-IX | 13.2 $\pm$ 2.7 (620 cells counted)                           | 4.7 $\pm$ 1.9 (557 cells counted)                                                  |

\*Co-staining was performed using rabbit anti-Sox9 and rat anti-E-cadherin or rat anti-Hes1 and rabbit anti- $\beta$ -catenin antibodies, respectively.

**Table S4. Sox9-regulated genes in ducts**

Complete list of genes with a greater than 1.5-fold change

| Decreased in <i>Sox9</i> -deficient pancreata |             | Increased in <i>Sox9</i> -deficient pancreata |             |
|-----------------------------------------------|-------------|-----------------------------------------------|-------------|
| Gene symbol                                   | Fold change | Gene symbol                                   | Fold change |
| <i>Sox9</i>                                   | -5.6        | <i>Slc15a2</i>                                | 3.0         |
| <i>Slc28a3</i>                                | -5.5        | <i>Atf3</i>                                   | 2.8         |
| <i>Pkd2</i>                                   | -3.7        | <i>Tnfrsf12a</i>                              | 2.7         |
| <i>Gm905</i>                                  | -3.2        | <i>Dsg2</i>                                   | 2.2         |
| <i>Sdc4</i>                                   | -2.7        | <i>Tmprss2</i>                                | 2.2         |
| <i>Lrp6</i>                                   | -2.5        | <i>Pik3ap1</i>                                | 2.2         |
| <i>Fmo2</i>                                   | -2.5        | <i>Cnksr3</i>                                 | 2.1         |
| <i>Fgfr4</i>                                  | -2.4        | <i>Itgb6</i>                                  | 2.1         |
| <i>Ces3</i>                                   | -2.2        | <i>Pdgfd</i>                                  | 2.1         |
| <i>Spp1</i>                                   | -2.2        | <i>1700025G04Rik</i>                          | 2.0         |
| <i>Fmol1</i>                                  | -2.2        | <i>Onecut1</i>                                | 1.9         |
| <i>Gabrp</i>                                  | -2.1        | <i>Jun</i>                                    | 1.8         |
| <i>Hisppd2a</i>                               | -2.1        | <i>Arid5b</i>                                 | 1.8         |
| <i>Ppp1r1b</i>                                | -2.1        | <i>Tcfcp2l1</i>                               | 1.7         |
| <i>BC030476</i>                               | -2.1        | <i>Sbf2</i>                                   | 1.7         |
| <i>Wnk2</i>                                   | -2.0        | <i>Lamc2</i>                                  | 1.7         |
| <i>Zfp704</i>                                 | -1.9        | <i>Fer1l3</i>                                 | 1.7         |
| <i>Mgam</i>                                   | -1.8        | <i>Chrnbl</i>                                 | 1.7         |
| <i>Ildr1</i>                                  | -1.8        | <i>3110050N22Rik</i>                          | 1.7         |
| <i>Tmem45a</i>                                | -1.8        | <i>Cyr61</i>                                  | 1.7         |
| <i>Tesc</i>                                   | -1.8        | <i>Cxadr</i>                                  | 1.6         |
| <i>Mgst1</i>                                  | -1.8        | <i>Lcor</i>                                   | 1.6         |
| <i>Mod1</i>                                   | -1.8        | <i>Cald1</i>                                  | 1.6         |
| <i>A830059I20Rik</i>                          | -1.7        | <i>Tns1</i>                                   | 1.6         |
| <i>Ncald</i>                                  | -1.7        | <i>Rdh10</i>                                  | 1.6         |
| <i>8430419L09Rik</i>                          | -1.7        | <i>Slc2a2</i>                                 | 1.6         |
| <i>App</i>                                    | -1.7        | <i>Tshz2</i>                                  | 1.6         |
| <i>Prdm16</i>                                 | -1.7        | <i>Cxcl16</i>                                 | 1.6         |
| <i>Spink4</i>                                 | -1.7        | <i>Nsdhl</i>                                  | 1.6         |
| <i>Kcnn4</i>                                  | -1.7        | <i>Cdc42ep1</i>                               | 1.6         |
| <i>Nkx2-2</i>                                 | -1.7        | <i>Nedd4</i>                                  | 1.6         |
| <i>Krt23</i>                                  | -1.6        | <i>Ror1</i>                                   | 1.6         |
| <i>Smoc1</i>                                  | -1.6        | <i>Pdgfa</i>                                  | 1.6         |
| <i>Zdhhc2</i>                                 | -1.6        | <i>Junb</i>                                   | 1.6         |
| <i>BC021891</i>                               | -1.6        | <i>Pkhd1</i>                                  | 1.6         |
| <i>Epb4.111</i>                               | -1.6        | <i>Sash1</i>                                  | 1.5         |
| <i>Hpgd</i>                                   | -1.6        | <i>Ier3</i>                                   | 1.5         |
| <i>Tinagl</i>                                 | -1.5        | <i>Zc3h11a</i>                                | 1.5         |
| <i>Ccdc68</i>                                 | -1.5        | <i>Smg6</i>                                   | 1.5         |
| <i>Arl15</i>                                  | -1.5        | <i>Stk3</i>                                   | 1.5         |
| <i>Dtx4</i>                                   | -1.5        |                                               |             |
| <i>Pcyt1b</i>                                 | -1.5        |                                               |             |
| <i>Adcy2</i>                                  | -1.5        |                                               |             |
